# Supplementary material for: miR-33 deletion in hepatocytes attenuates MASLD-MASH-HCC progression
Source: JCI journal article supplement (doi:10.1172/jci.insight.168476), 2024-08-27

BLOTS FROM FIGURE 2K

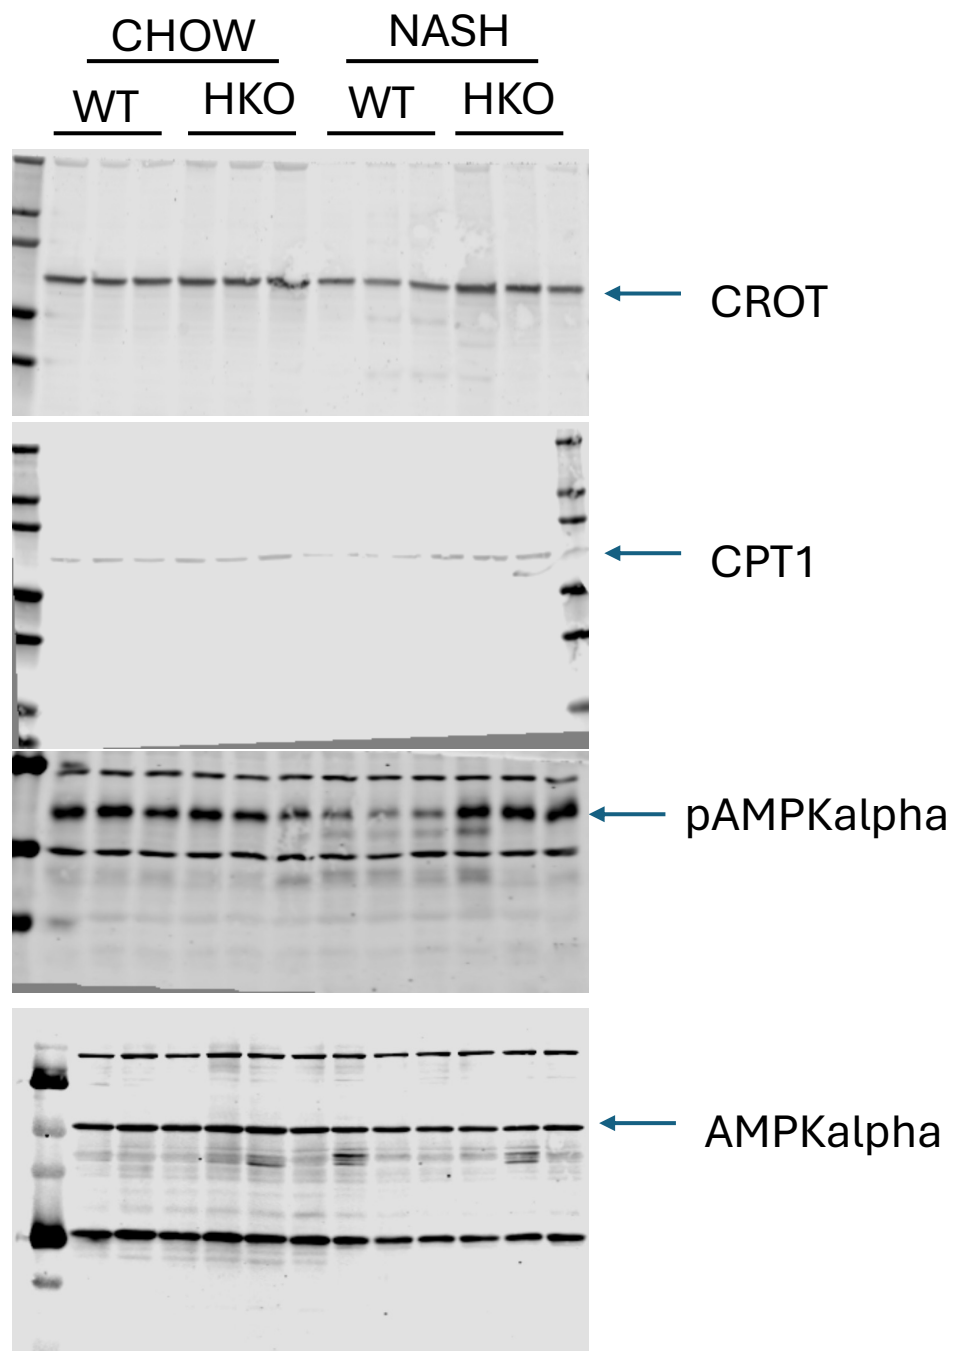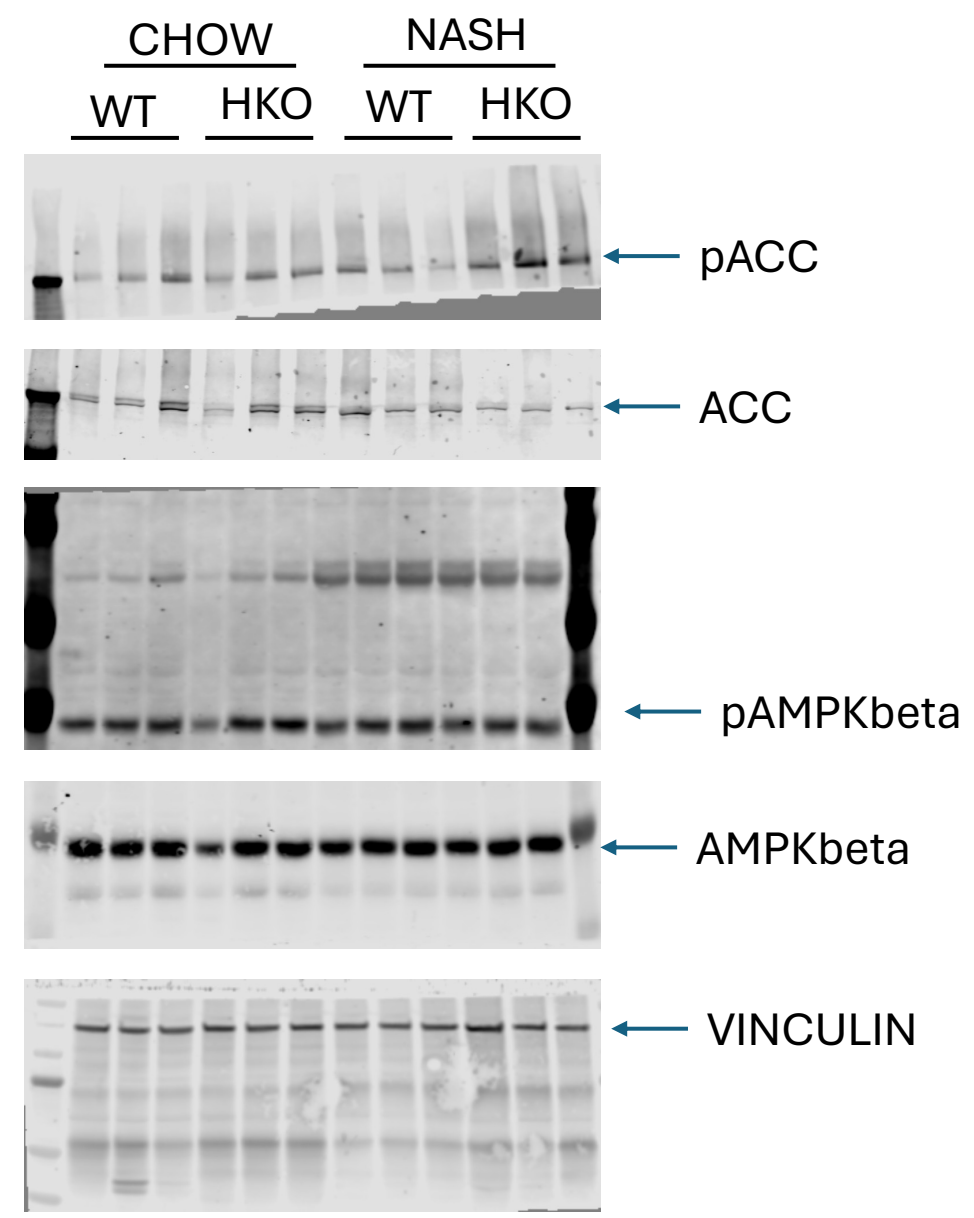

BLOTS FROM FIGURE 4c

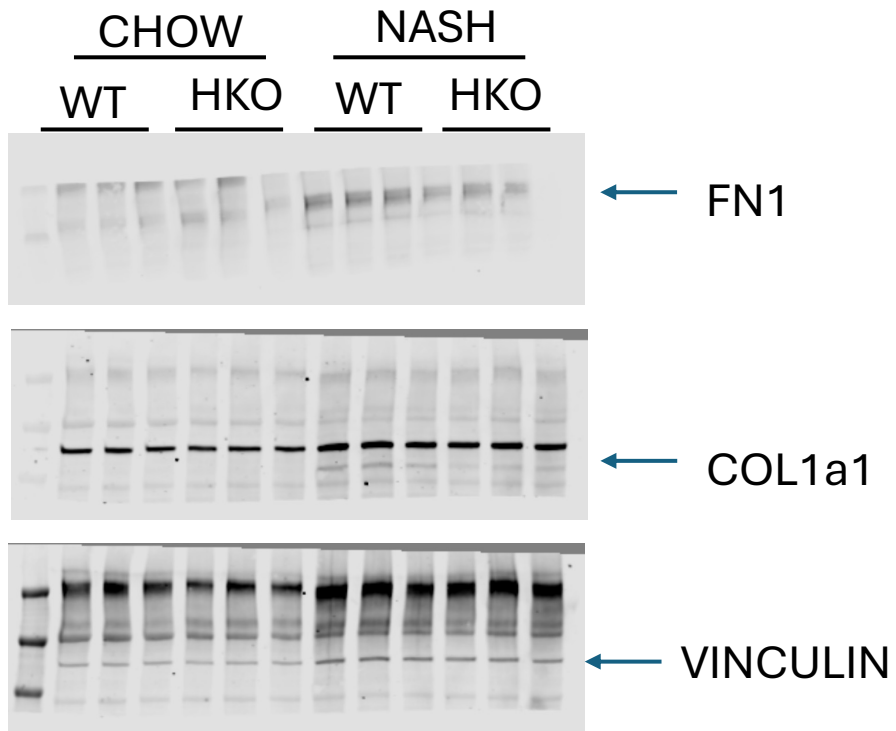

BLOTS FROM FIGURE 6

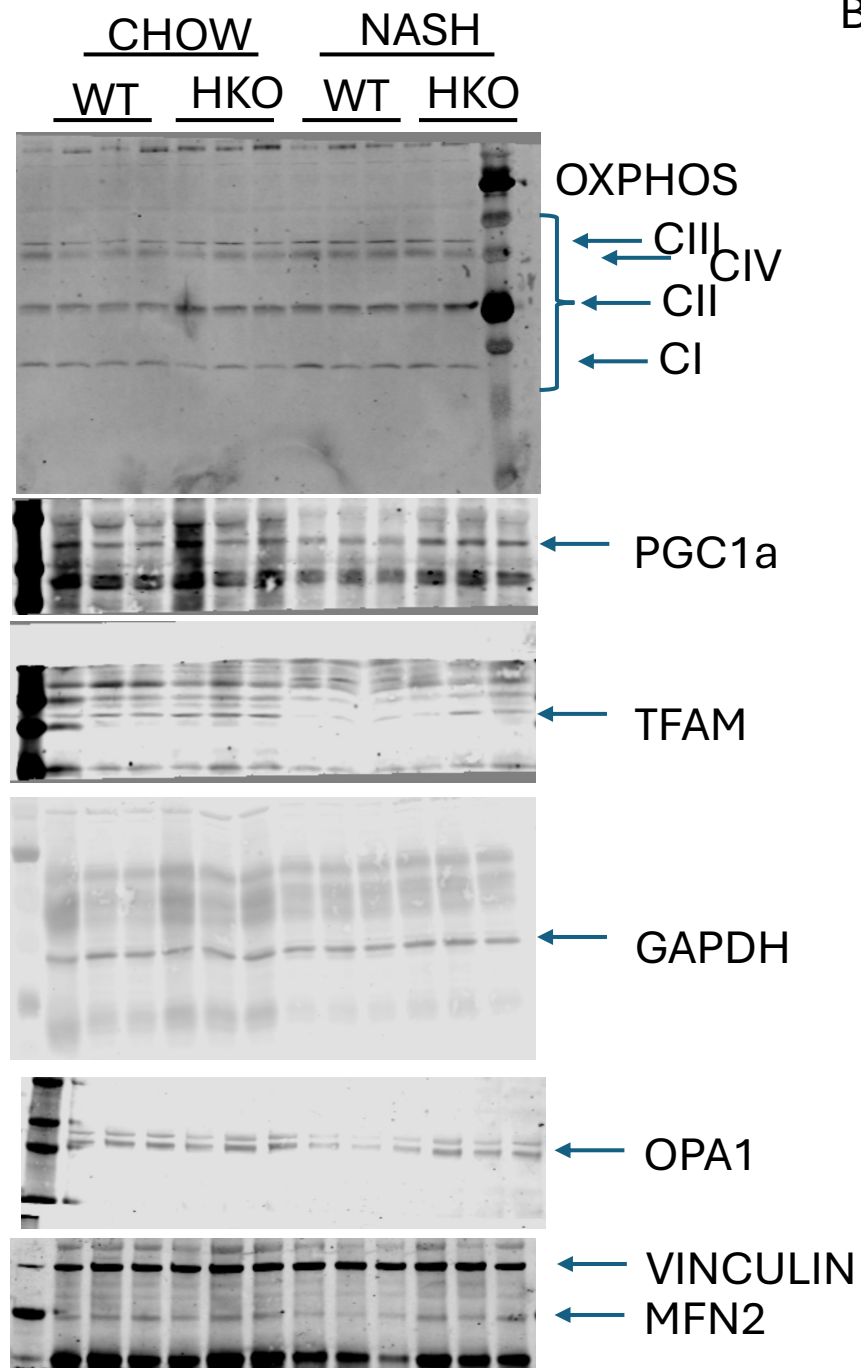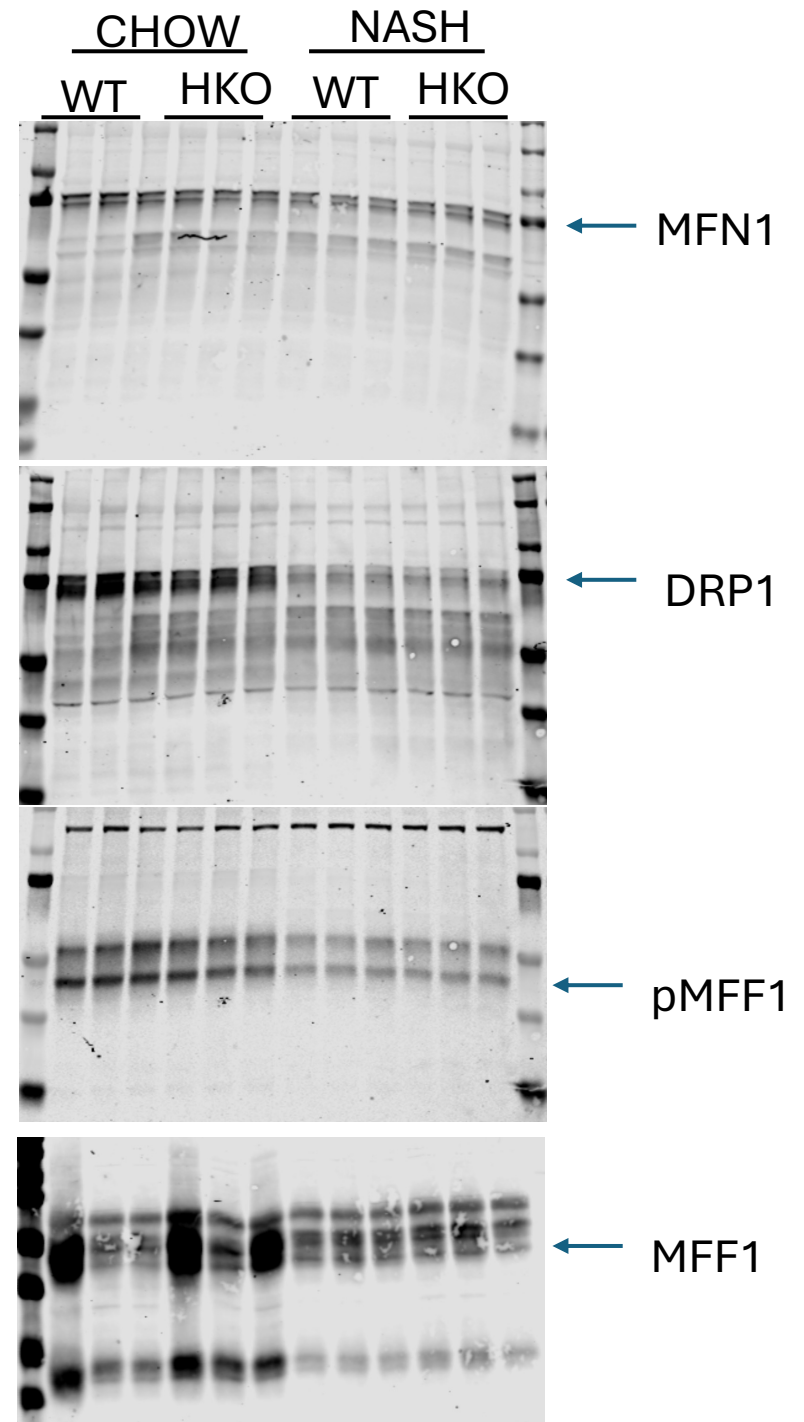

BLOTS FROM FIGURE 7A

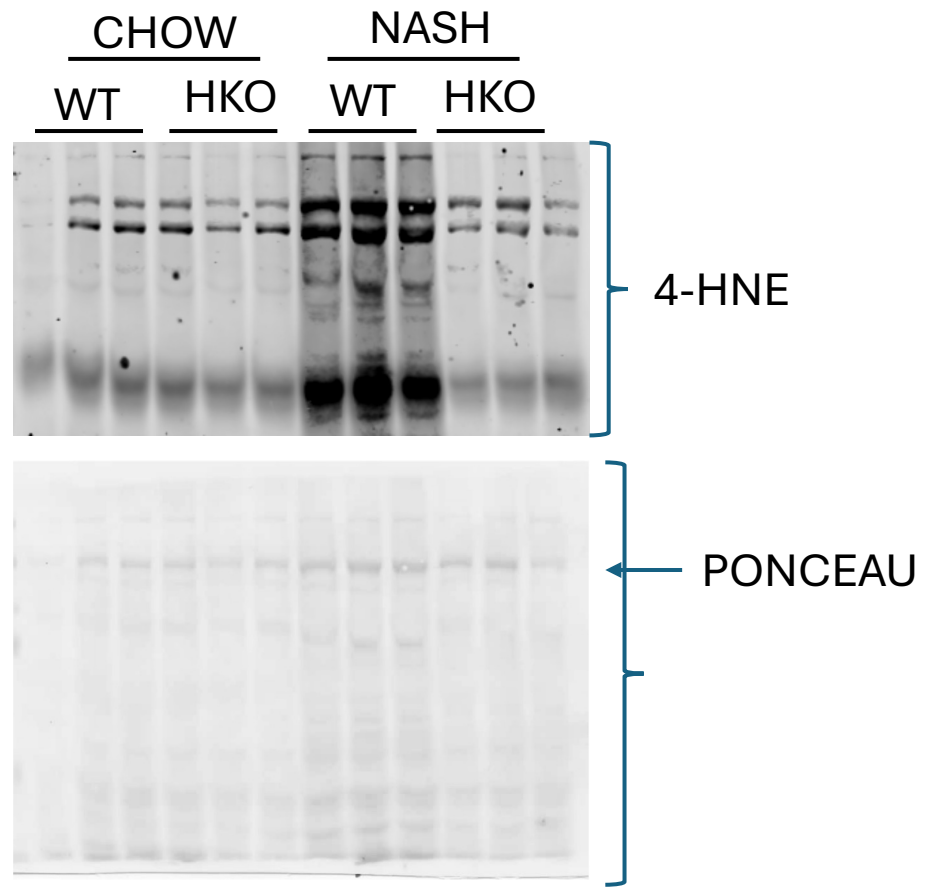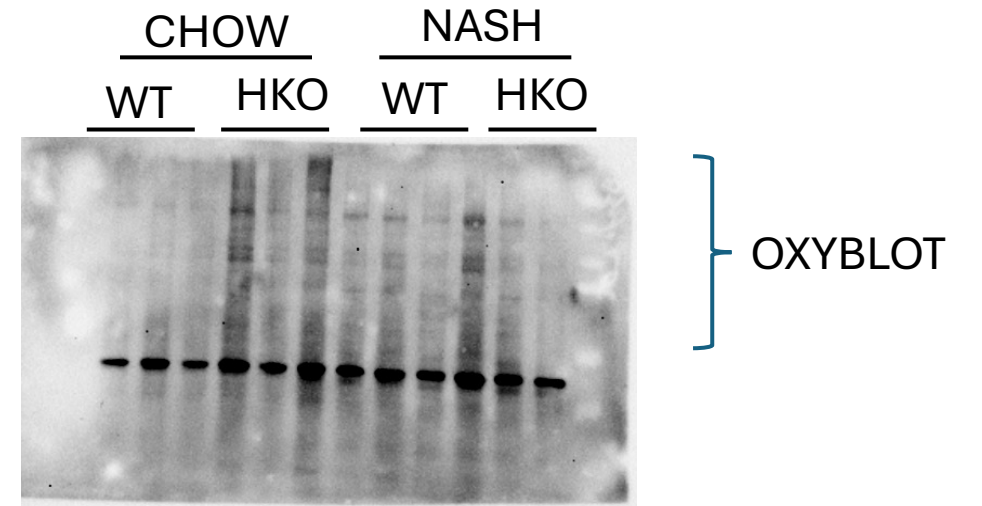

BLOTS FROM FIGURE 8A

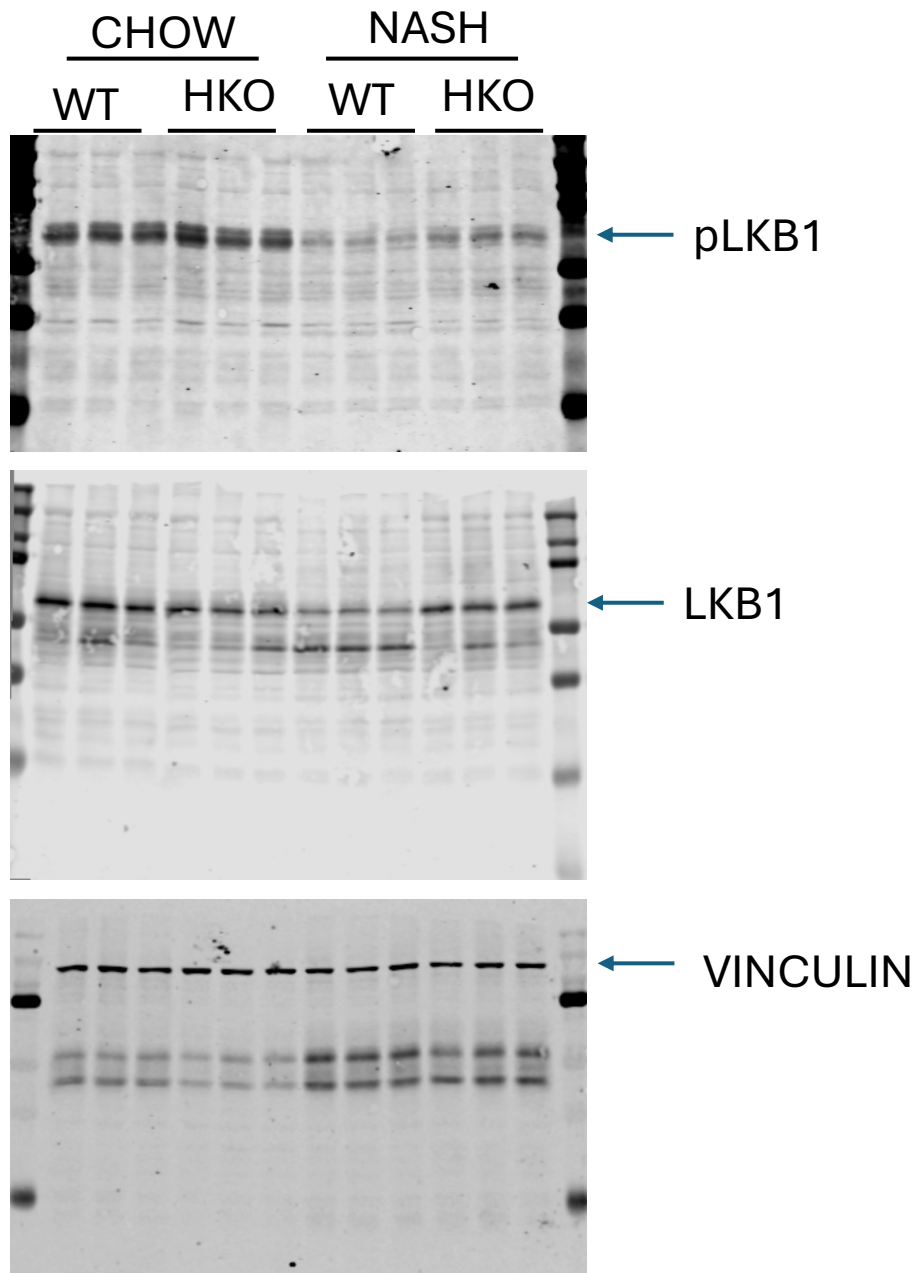

BLOTS FROM FIGURE 8C

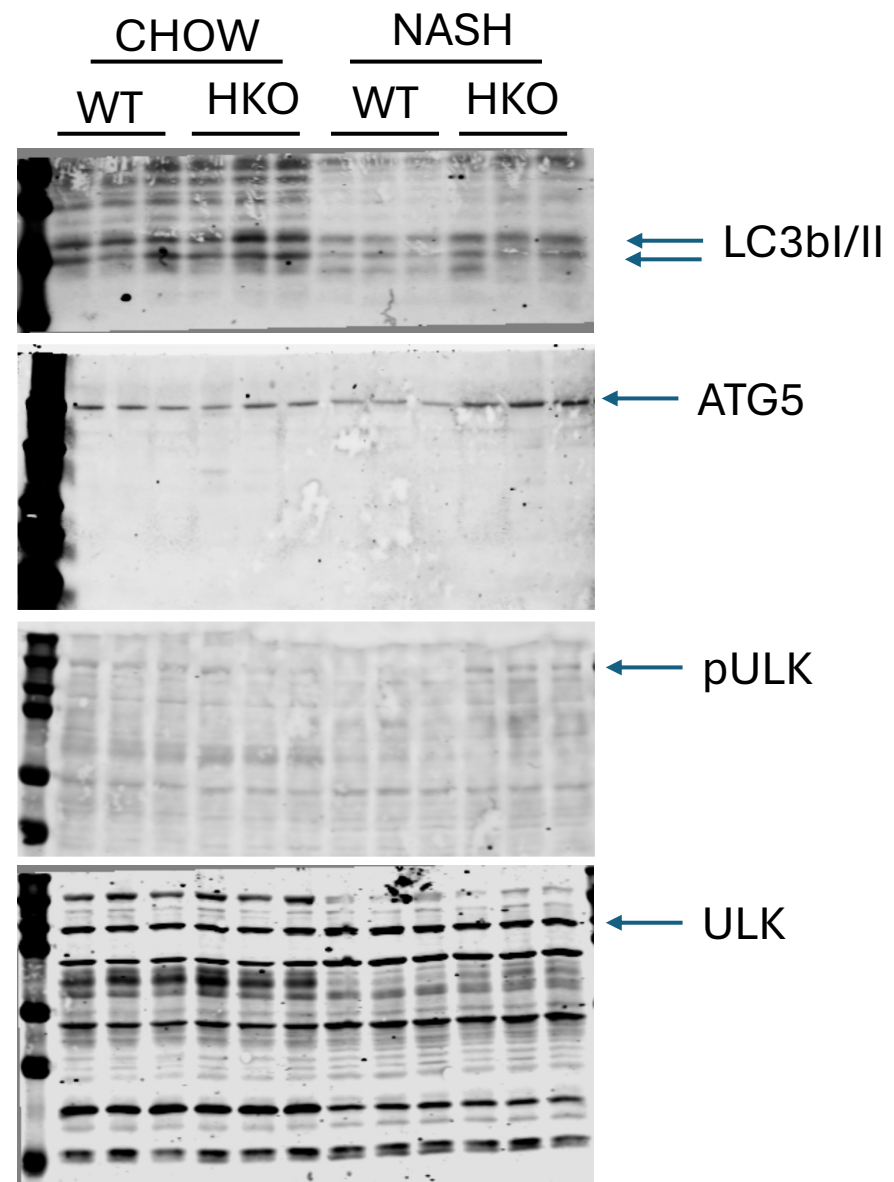

BLOTS FROM FIGURE 8B

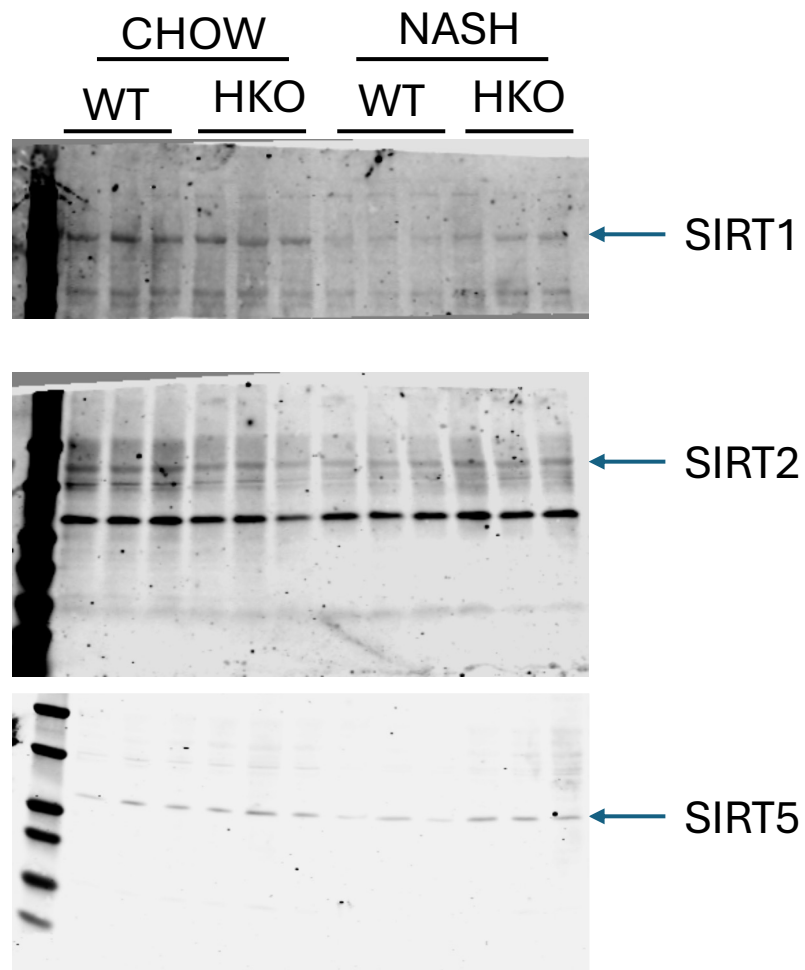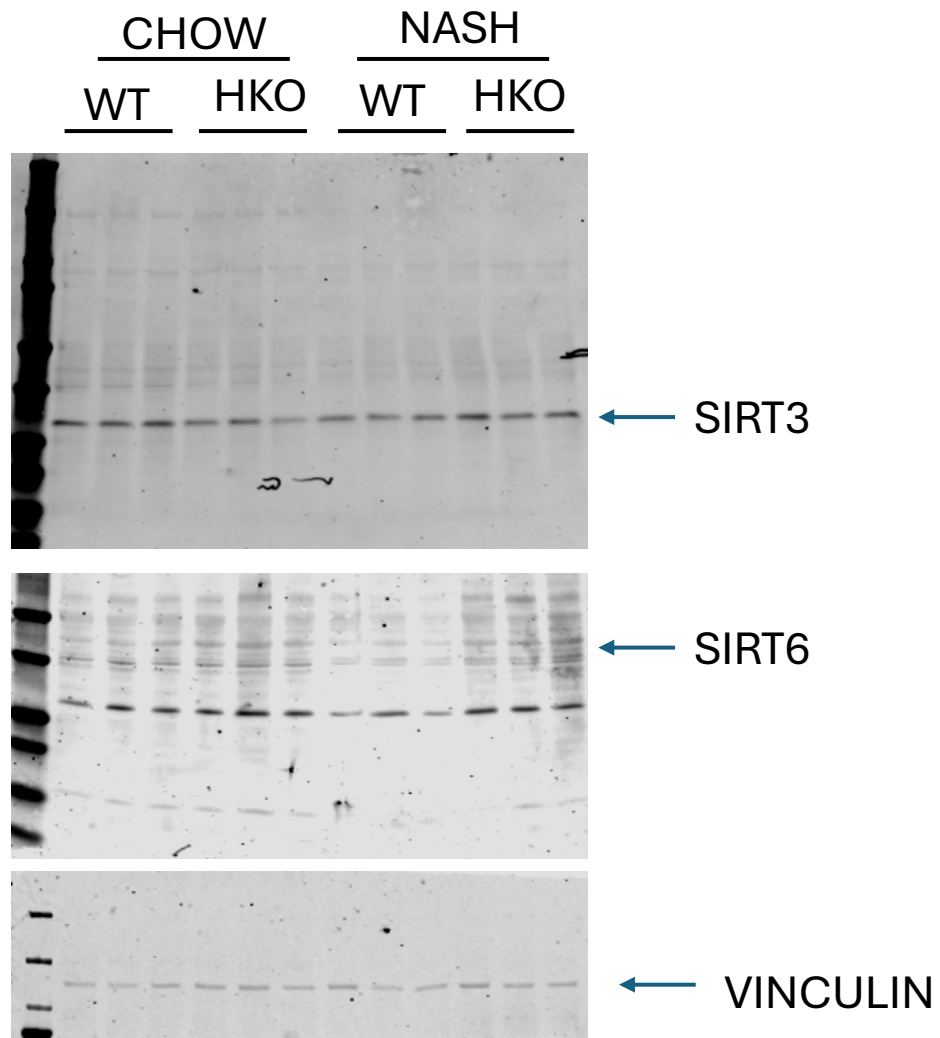

BLOTS FROM FIGURE 9F

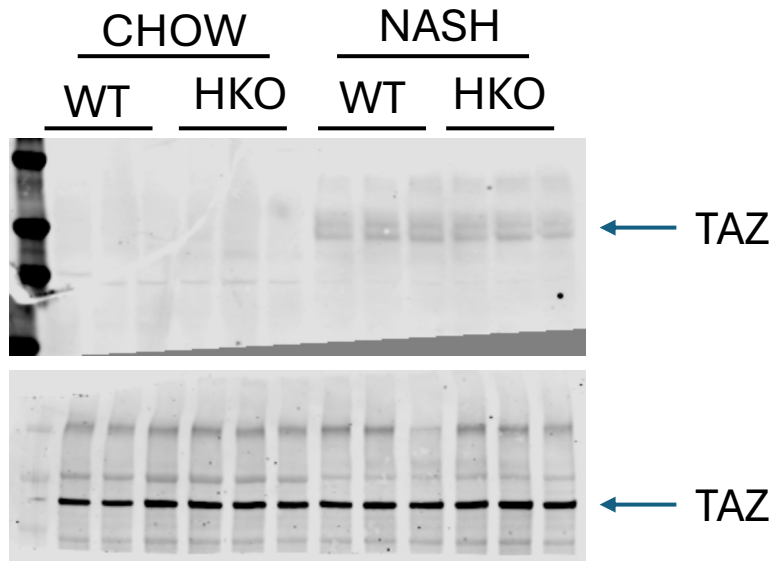

BLOTS FROM FIGURE 9G

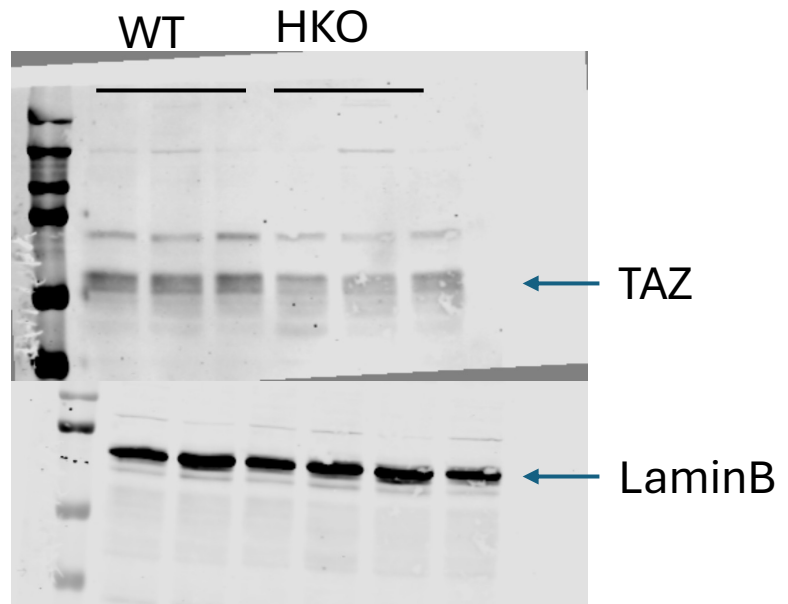

BLOTS FROM SUPPLEMENTAL FIGURE 2

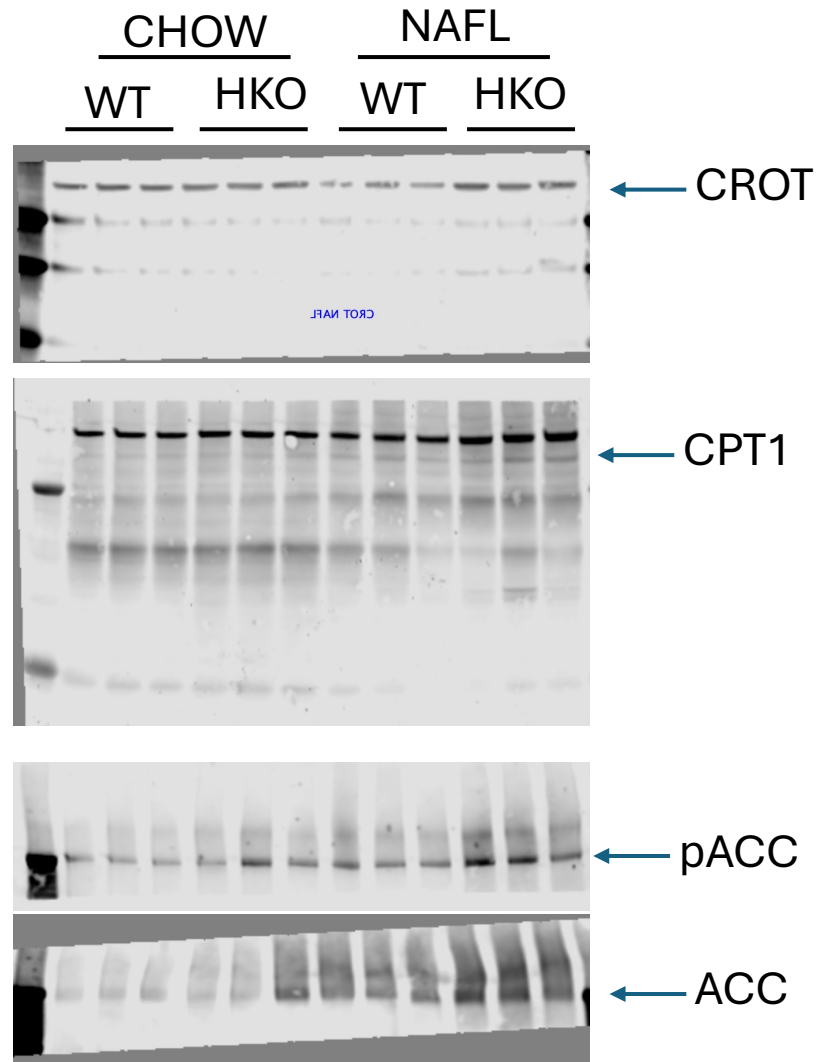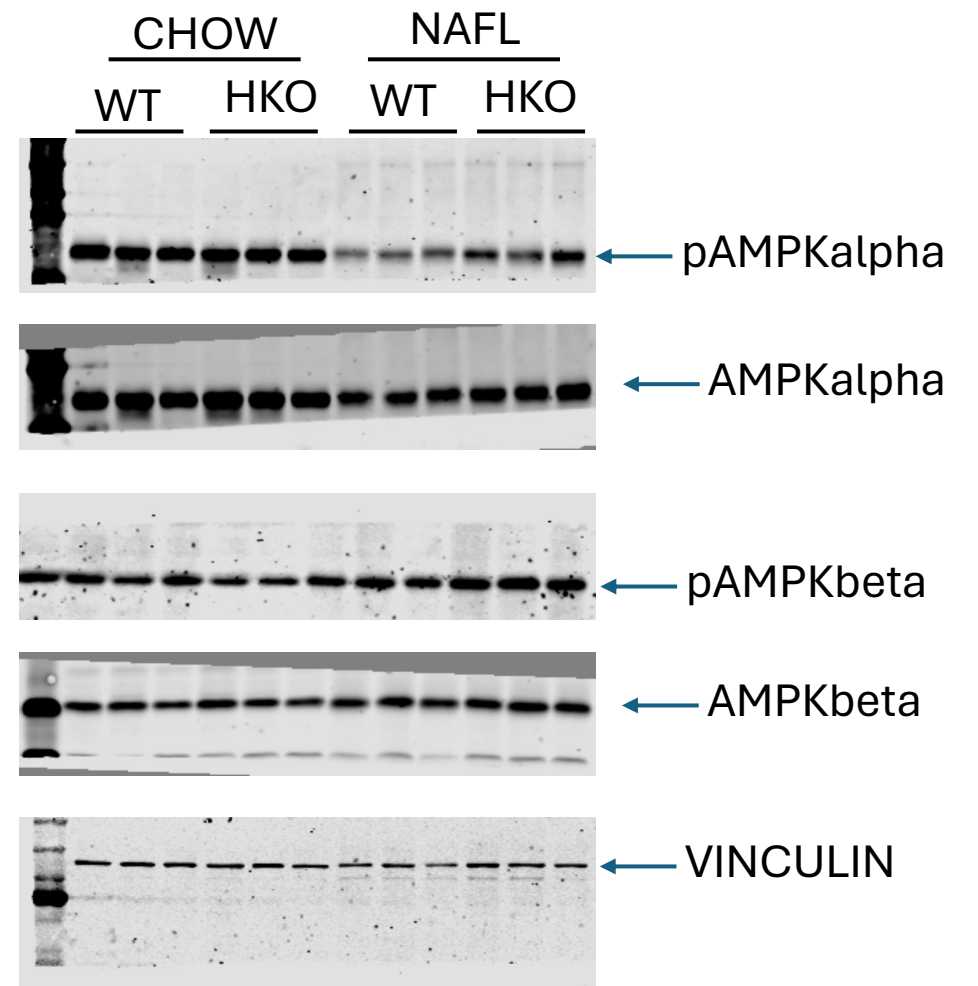



BLOTS FROM SUPPLEMENTAL FIGURE 3A

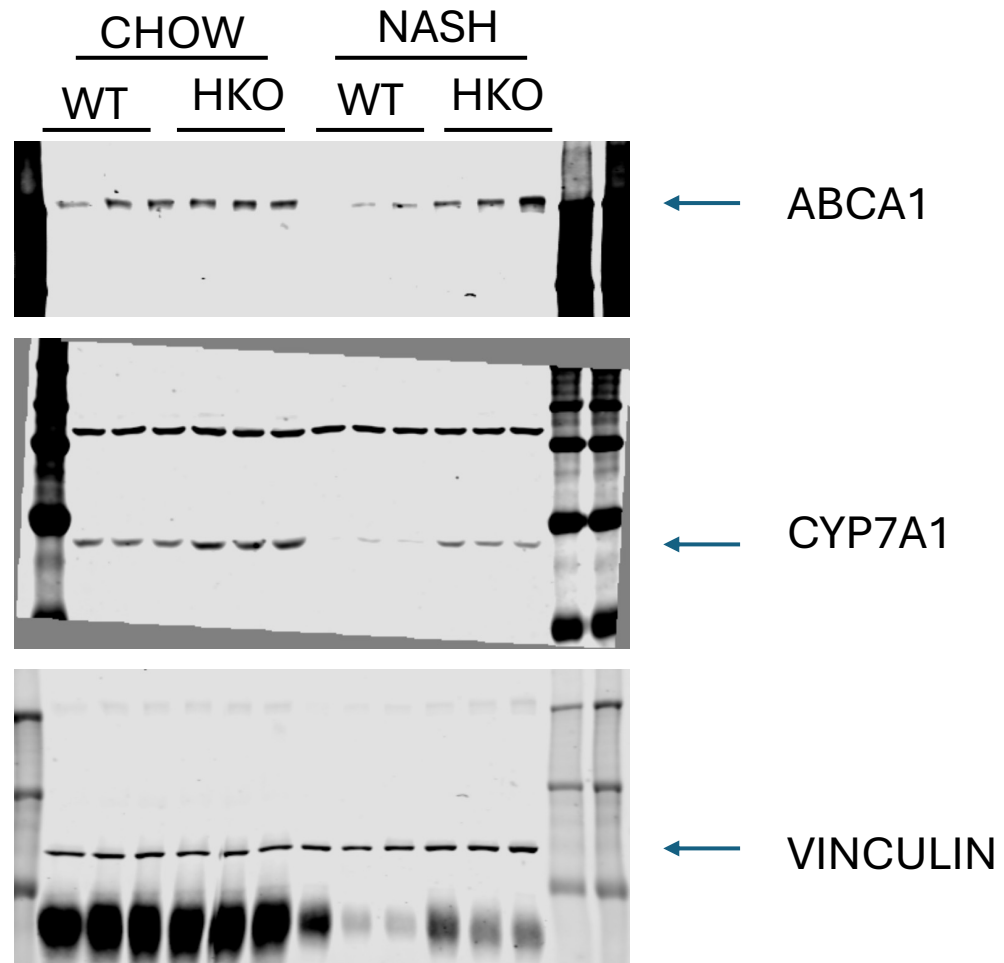

BLOTS FROM SUPPLEMENTAL FIGURE 6C

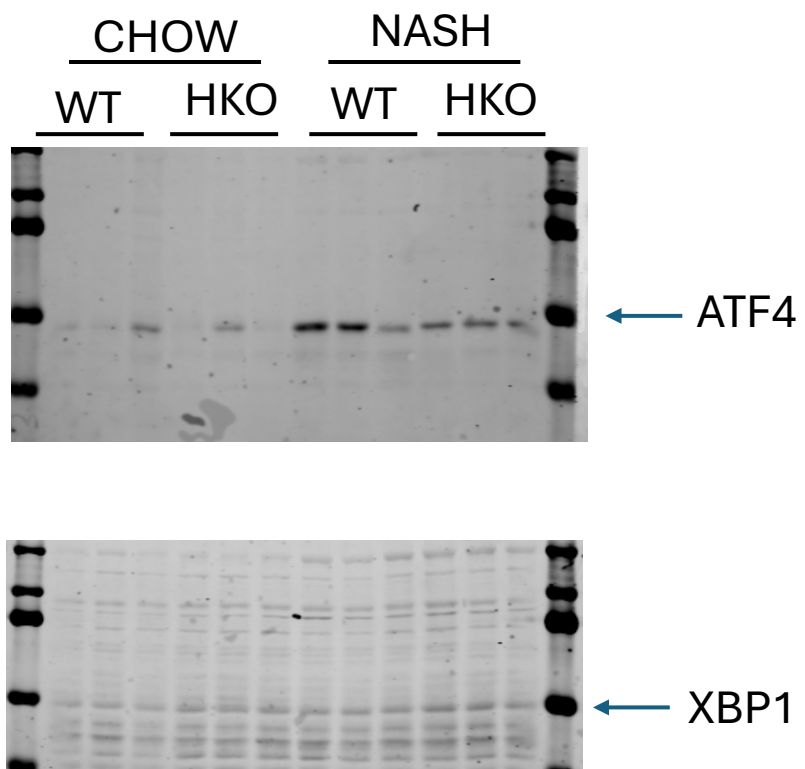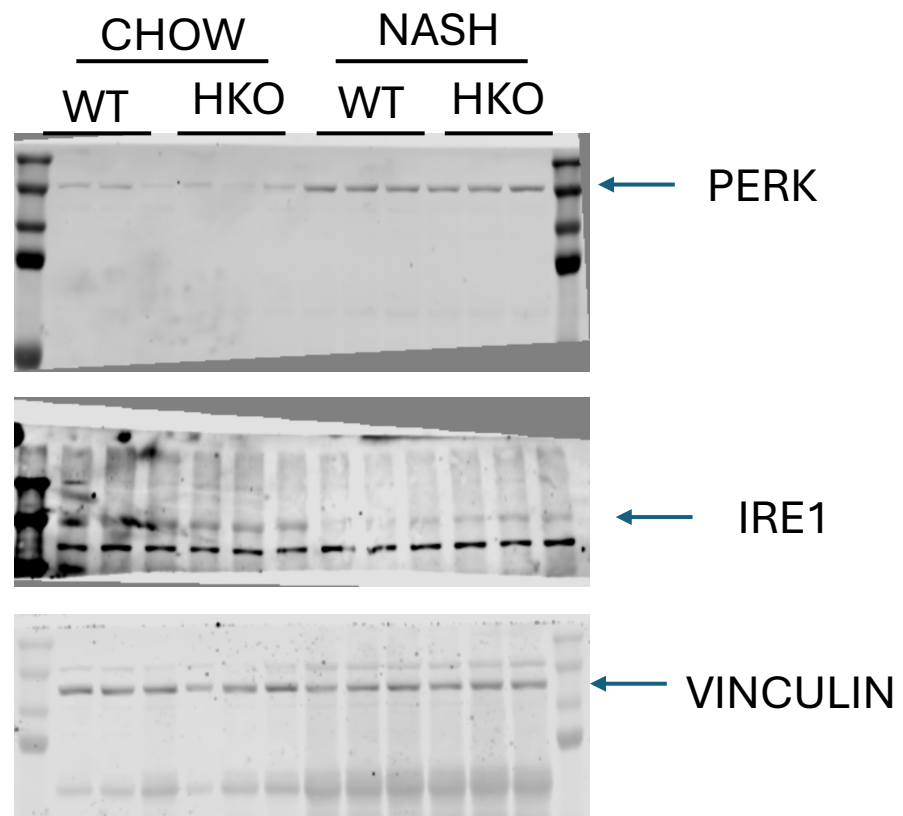

BLOTS FROM SUPPLEMENTAL FIGURE 6F

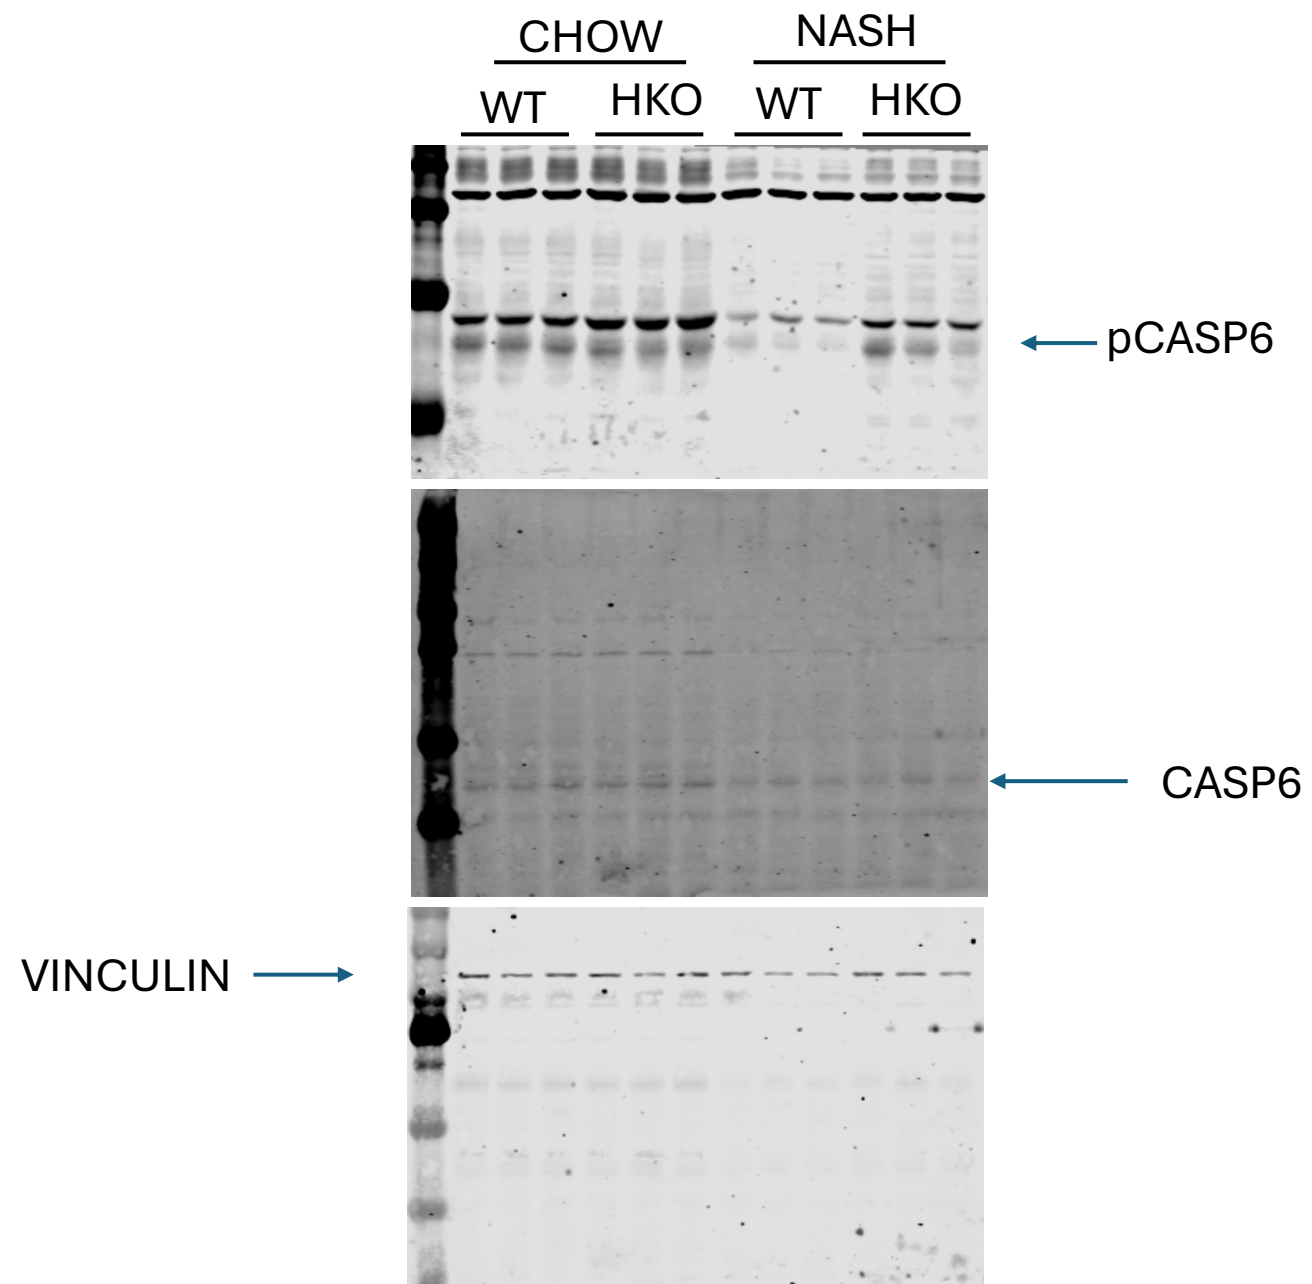

BLOTS FROM SUPPLEMENTAL FIGURE 8F

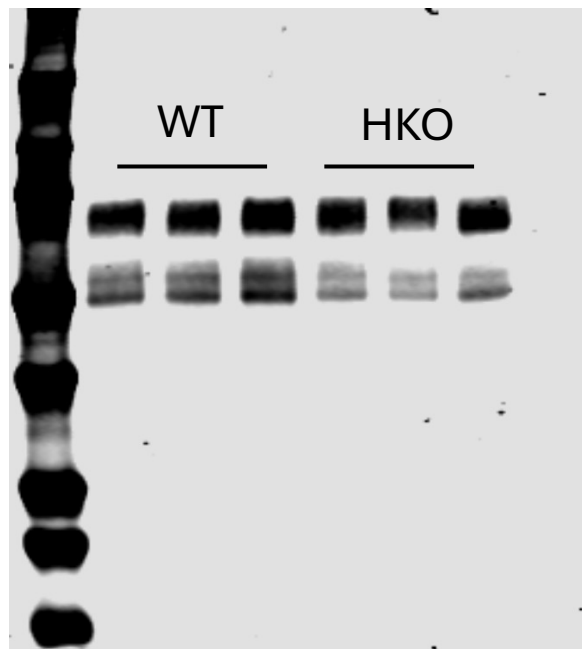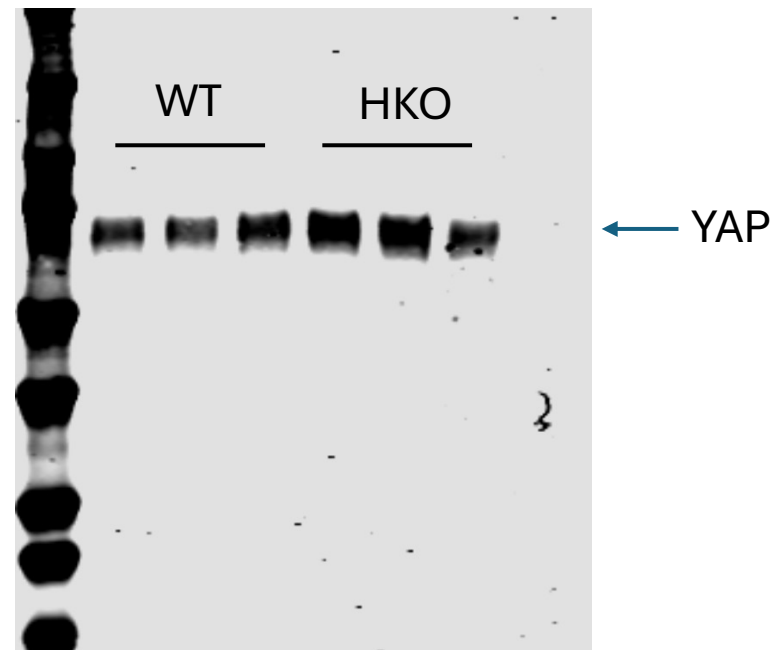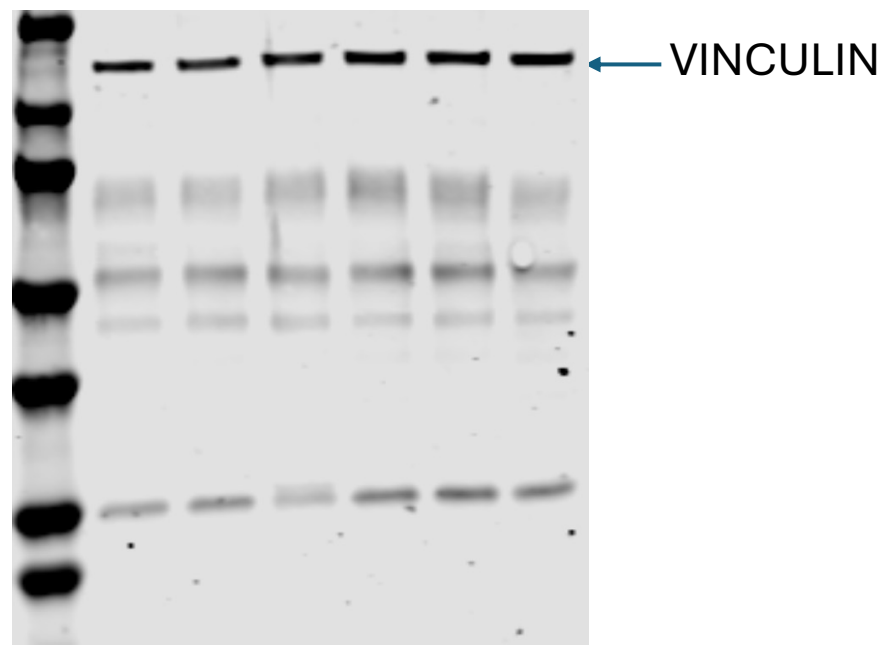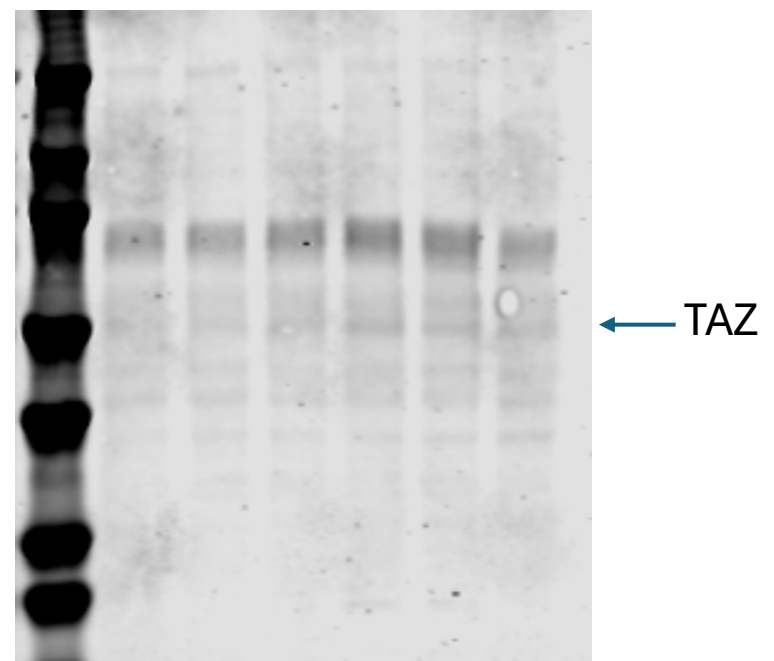

BLOTS FROM SUPPLEMENTAL FIGURE 8G

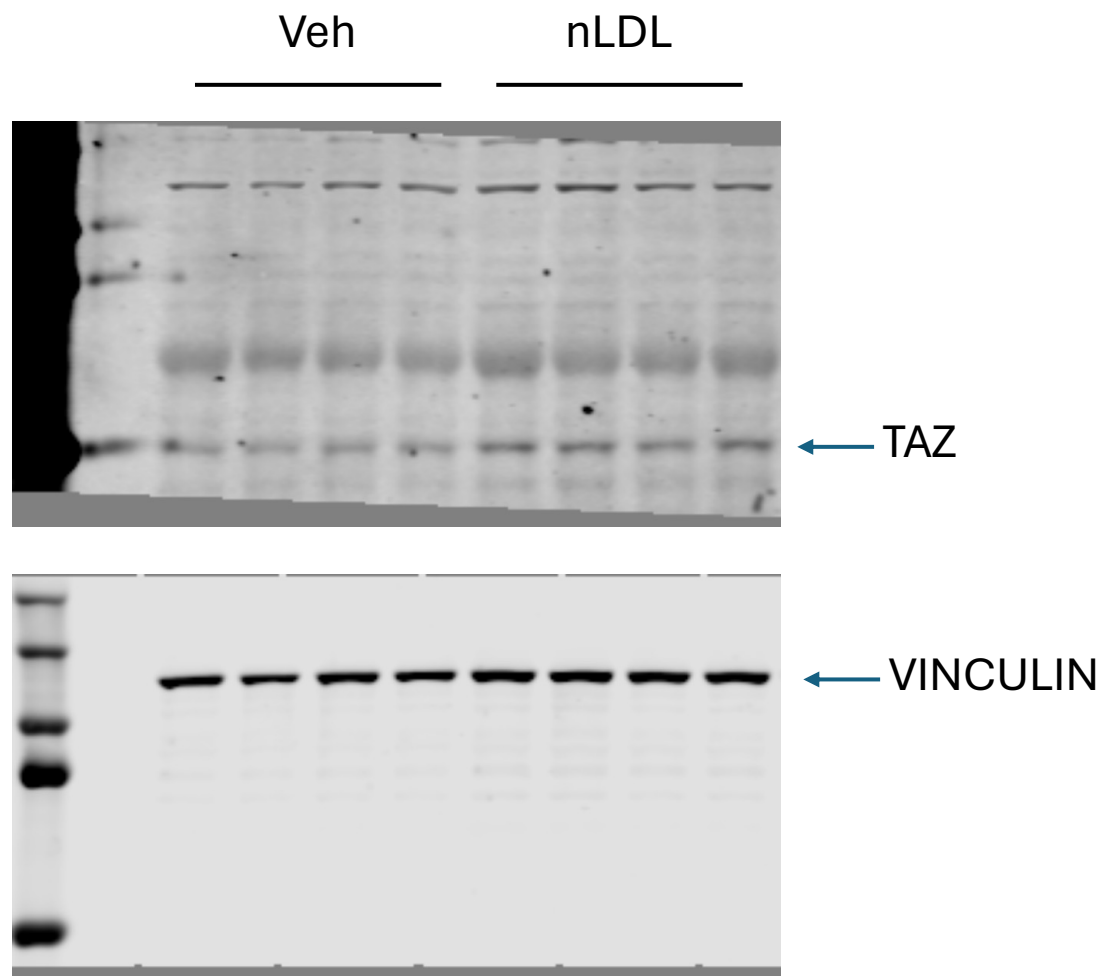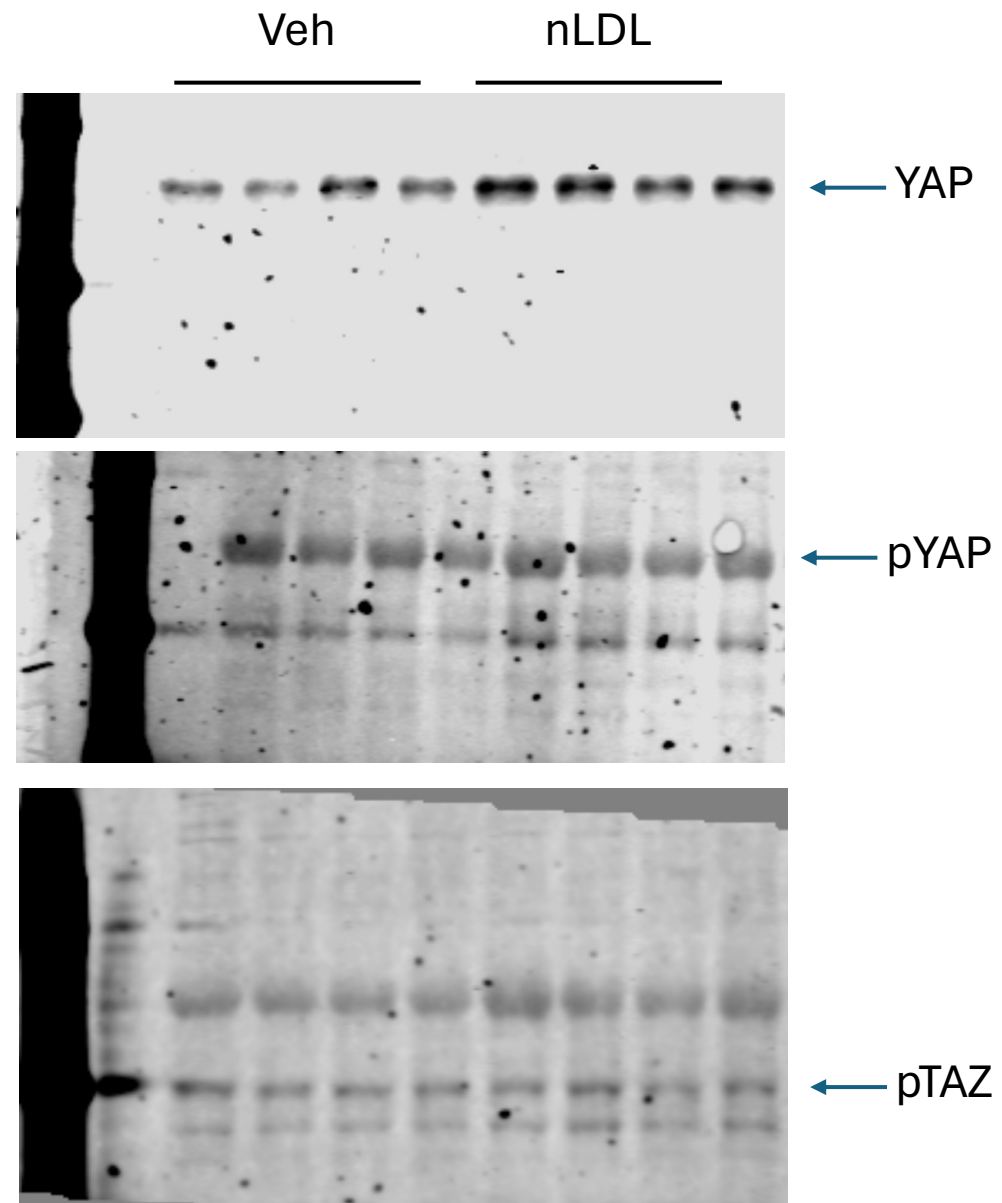

BLOTS FROM  
SUPPLEMENTAL  
FIGURE 8L

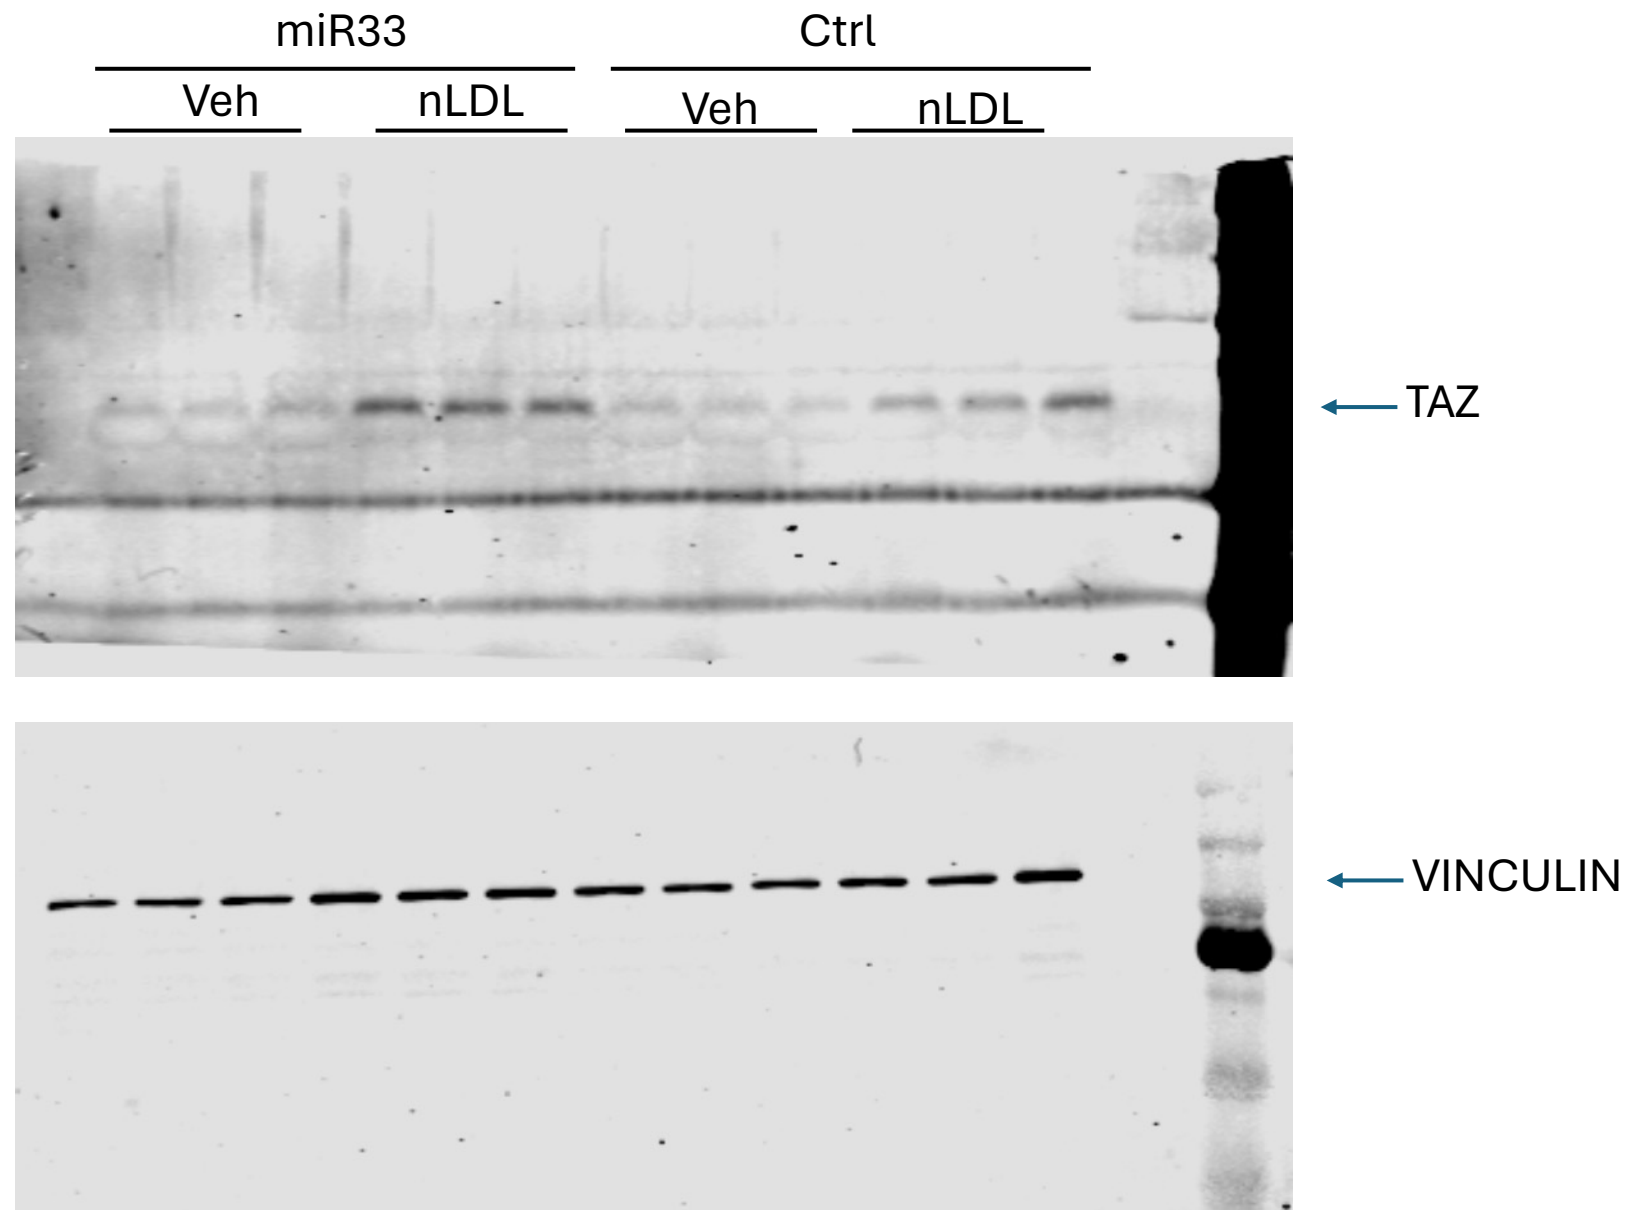

Supplement: sd2 [file 2]
